# Supplementary material for: Crystallization kinetics of amorphous red phosphorus to black phosphorus by chemical vapor transport
Source: Royal Society of Chemistry journal article supplement (doi:10.1039/d1ce01425k), 2021-11-23
Supplement: d1ce01425k1.pdf [file d1ce01425k1.pdf]

Supporting Information for

# Crystallization kinetics of amorphous red phosphorus to black phosphorus by chemical vapor transport

*Shuai Zhang,<sup>a, b</sup> Shufang Ma,<sup>\*a</sup> Xiaodong Hao,<sup>a</sup> Qingming Liu,<sup>a, b</sup> Yanyan Hou,<sup>a, b</sup>*

*Qingbo Kong,<sup>a, b</sup> Zhaoru Chen,<sup>b</sup> Hanyu Ma,<sup>b</sup> Ting Xi,<sup>a, b</sup> Yang Xu,<sup>a, b</sup> Ben Cao,<sup>a, b</sup> Lin*

*Shang,<sup>a</sup> Bin Han,<sup>a</sup> Bingshe Xu<sup>\*a, c</sup>*

<sup>a</sup> Materials Institute of Atomic and Molecular Science, Shaanxi University of Science and Technology, Xi'an 710021, China

<sup>b</sup> School of Materials Science and Engineering, Shaanxi University of Science and Technology, Xi'an 710021, China

<sup>c</sup> Key Laboratory of Interface Science and Engineering in Advanced Materials of Ministry of Education, Taiyuan University of Technology, Taiyuan 030024, China

\*Author to whom correspondence should be addressed: [mashufang@sust.edu.cn](mailto:mashufang@sust.edu.cn);

[xubingshe@sust.edu.cn](mailto:xubingshe@sust.edu.cn)

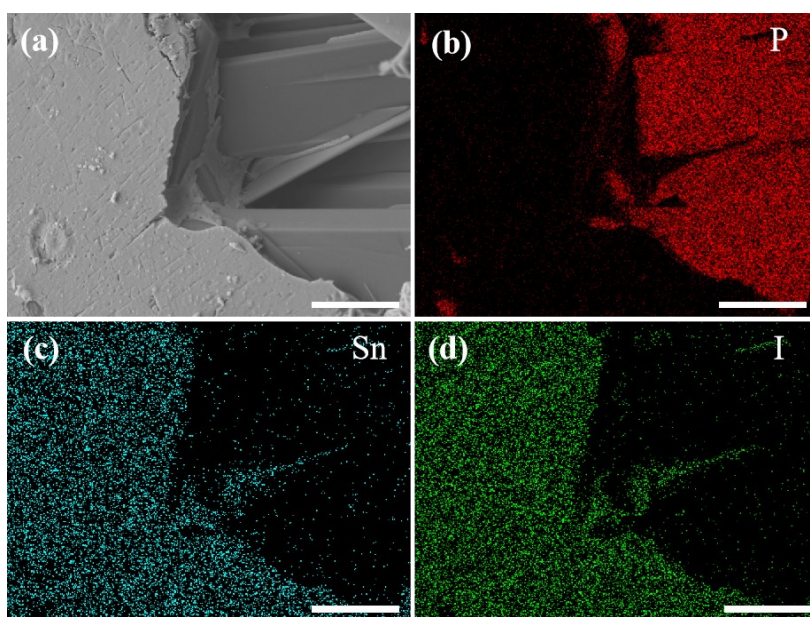

**Fig. S1** (a) SEM image of the nucleating agent and (b-d) corresponding element mapping of the nucleating agent shown in (a). The scale bars are 25  $\mu\text{m}$ .

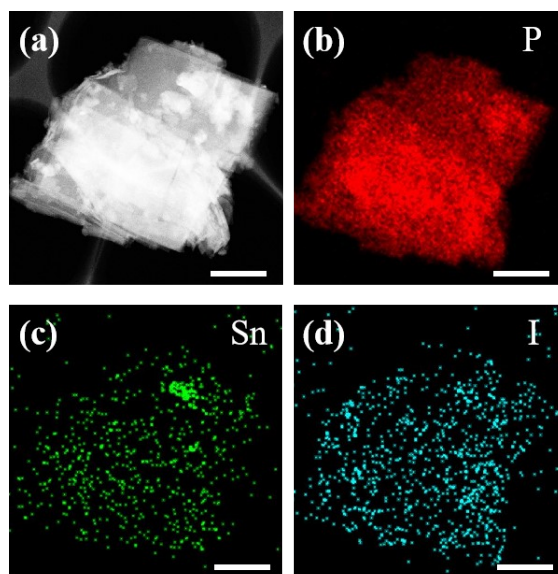

**Fig. S2** (a) STEM image of the nucleating agent and (b-d) corresponding element mapping of the nucleating agent shown in (a). The scale bars are 1  $\mu\text{m}$ .

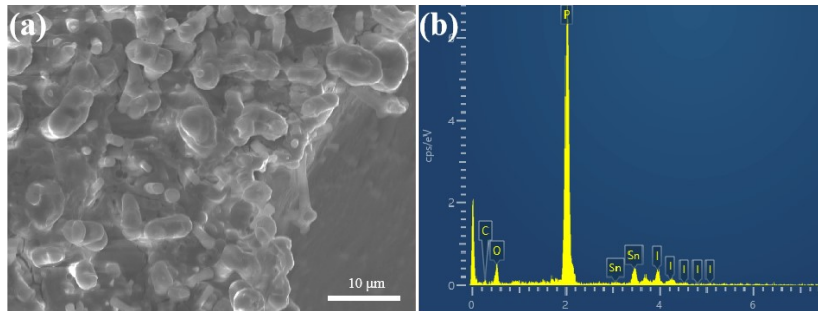

**Fig. S3** (a) SEM image of the product of the interrupted experiment at 560 °C. (b) The representative EDX spectrum in (a). Accordingly, the molar ratio of Sn:I is determined as ~3:1.

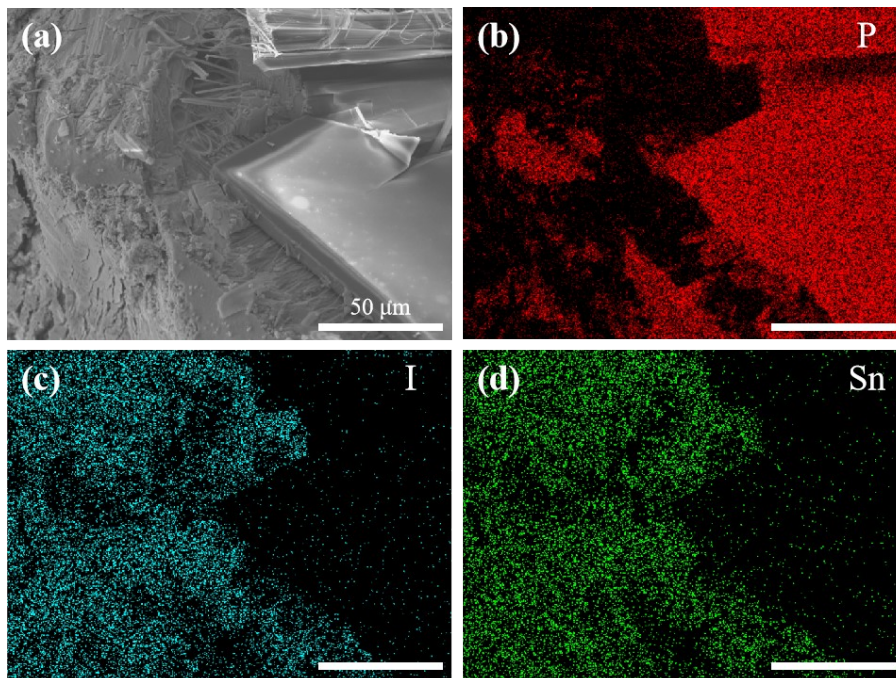

**Fig. S4** The SEM image of the product obtained after the experiment was interrupted at 550 °C and the EDS spectrum of the corresponding element distribution

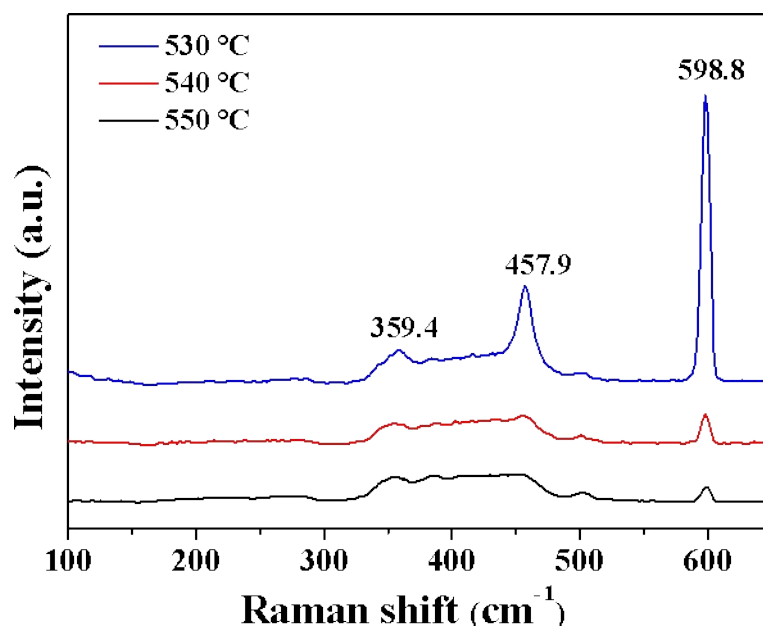

**Fig. S5** The Raman spectra of the product on the right side of the ampoule at different temperatures in the reaction interruption experiment.

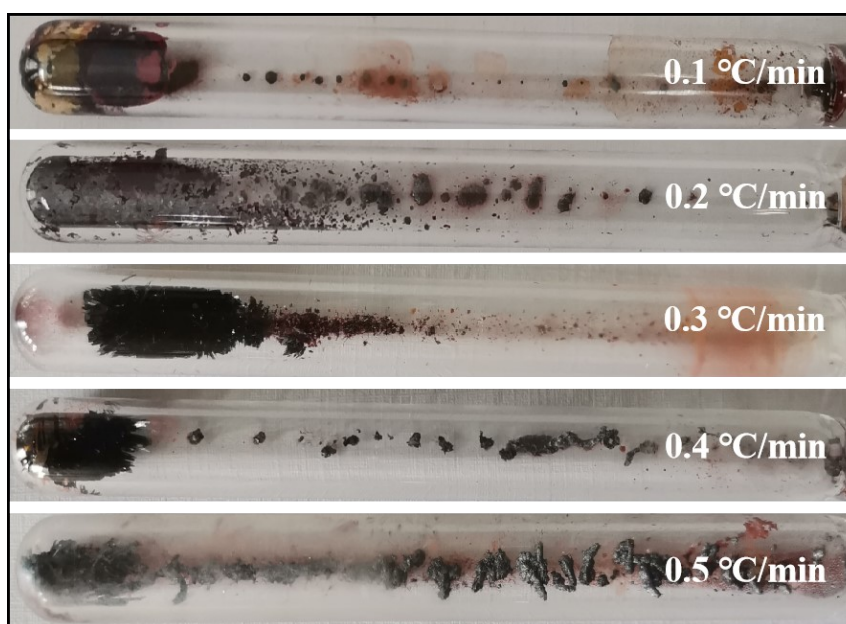

**Fig. S6** Optical images of the phosphorous structure produced by the mixture of aRP, Sn and I<sub>2</sub> at different reaction rates during the cooling stage at 560 to 540 °C.
